# Supplementary material for: Copper nanoparticle/carbon quantum dots hybrid as green photocatalyst for high-efficiency oxidation of cyclohexane
Source: Royal Society of Chemistry journal article supplement (doi:10.1039/c5ra04753f), 2015-01-01
Supplement: c5ra04753f1.pdf [file c5ra04753f1.pdf]

# Copper nanoparticle/carbon quantum dots hybrid as green photocatalyst for high efficiency oxidation of cyclohexane

## Supporting Information

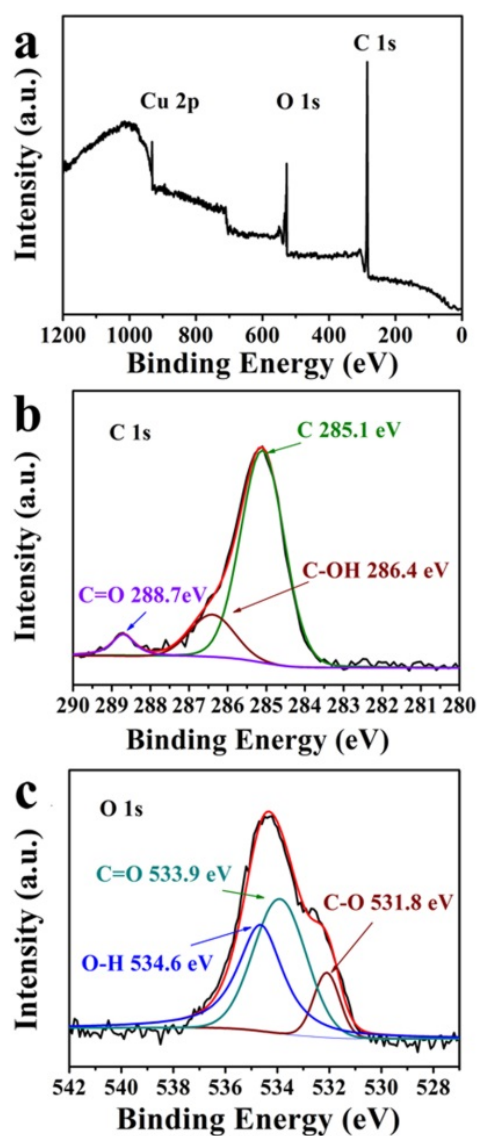

**Fig. S1** (a) XPS full spectrum of Cu/CQDs hybrids. (b and c) High-resolution C 1s and O 1s XPS spectra of Cu/CQDs hybrids.

**Table S1.** Photocatalytic oxidation of cyclohexane with Cu/CQDs as catalyst under visible light.

| Reaction time (h) | Conversion (%) | Selectivity (%) |                        |
|-------------------|----------------|-----------------|------------------------|
|                   |                | cyclohexanone   | $\sum_{\text{sel}}C_6$ |
| 6                 | 14.8           | 83.1            | 98.9                   |
| 12                | 26.1           | 82.7            | 97.4                   |
| 24                | 37.9           | 81.5            | 96.8                   |
| 36                | 44.4           | 79.1            | 96.3                   |
| 48                | 50.2           | 78.3            | 95.7                   |

**Table S2.** Photocatalytic oxidation of cyclohexane with Cu/CQDs as catalyst under dark.

| Reaction time (h) | Conversion (%) | Selectivity (%) |                        |
|-------------------|----------------|-----------------|------------------------|
|                   |                | cyclohexanone   | $\sum_{\text{sel}}C_6$ |
| 6                 | 2.0            | 80.6            | 98.6                   |
| 12                | 3.1            | 79.0            | 98.0                   |
| 24                | 4.2            | 77.1            | 97.5                   |
| 36                | 4.7            | 75.2            | 96.7                   |
| 48                | 4.9            | 73.3            | 96.2                   |

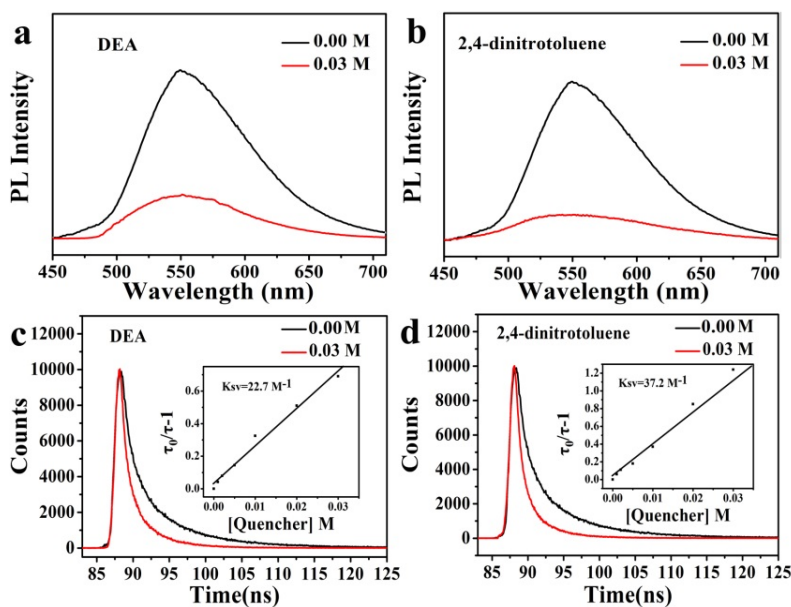

**Fig. S2** (a and b) PL spectra of CQDs with (red trace) and without (black trace) the quenchers DEA and 2,4-dinitrotoluene (485 nm excitation, monitored with 550 nm narrow bandpass filter), respectively. (c and d) Luminescence decays of CQDs with DEA and 2,4-dinitrotoluene, respectively. Insets are Stern-Volmer quenching plots of CQDs by (c) DEA and (d) 2,4-dinitrotoluene with the linear regression of 22.7 and 37.2  $\text{M}^{-1}$ , respectively.

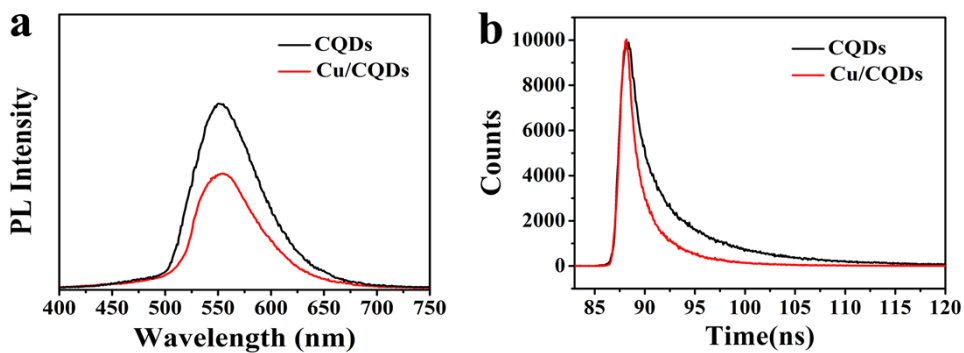

**Fig. S3** (a) PL spectra (485 nm excitation) and (b) Luminescence decays (485 nm excitation, monitored with 550 nm narrow bandpass filter) of CQDs (black line) and Cu/CQDs (red line).

**Table S3.** Photocatalytic oxidation of cyclohexane with Cu/graphene as catalyst under visible light.

| Cycle times | Conversion (%) | Selectivity (%) |                  |
|-------------|----------------|-----------------|------------------|
|             |                | Cyclohexanone   | $\sum_{sel} C_6$ |
| 1           | 32.3           | 69.5            | 90.5             |
| 2           | 18.4           | 67.2            | 88.4             |
| 3           | 13.2           | 65.0            | 83.8             |
